# Supplementary material
Source: publisher figshare collection journal article supplement (https://frontiersin.figshare.com/ndownloader/files/25527476)
Supplement: Supplementary file 1 [file 25527476]

**Supplement 1: Exemplary CORA-Task (Task 5)**

**TASK 5: Government revenue**

The following tweet appears in your Twitter feed:

<https://twitter.com/insm/status/940882976866435072>

To what extent is the tweet suitable as a source of information on government revenues in recent years? Answer both questions.

1. Why could this tweet be a reliable source of information on government revenue in recent years?
2. Why could this tweet be an unreliable source of information on government revenue in recent years?

You can use any information on this website, as well as search the Internet. Justify your answers with evidence from the Internet sources used and include the corresponding URLs.
